# Supplementary material for: High-flow nasal cannula oxygen therapy is superior to conventional oxygen therapy but not to noninvasive mechanical ventilation on intubation rate: a systematic review and meta-analysis
Source: Springer Nature journal article supplement (doi:10.1186/s13054-017-1760-8), 2017-07-12

(a)

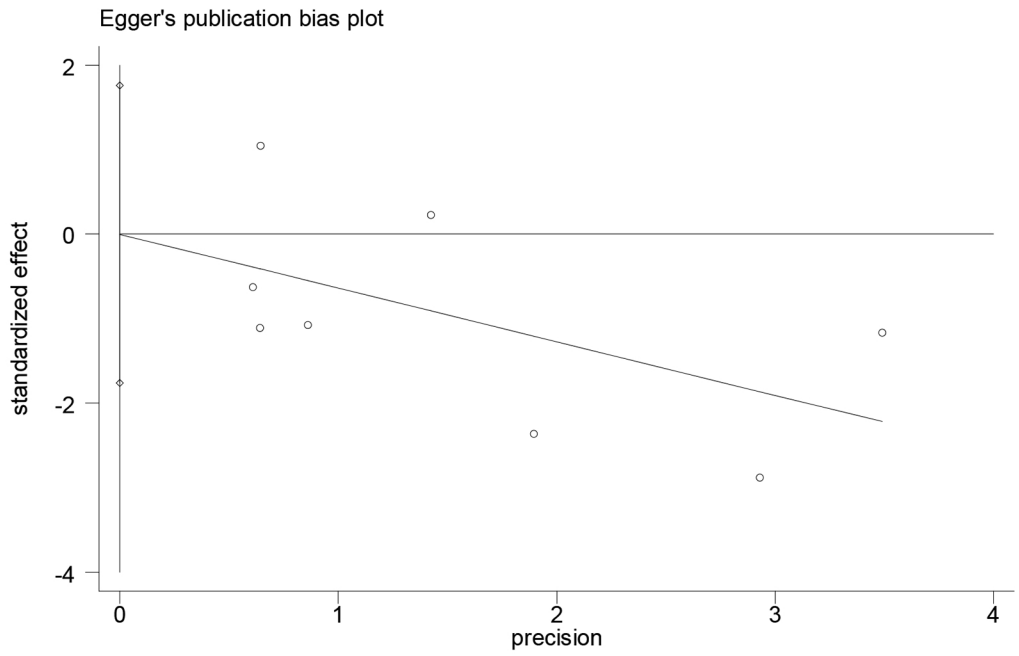

(b)

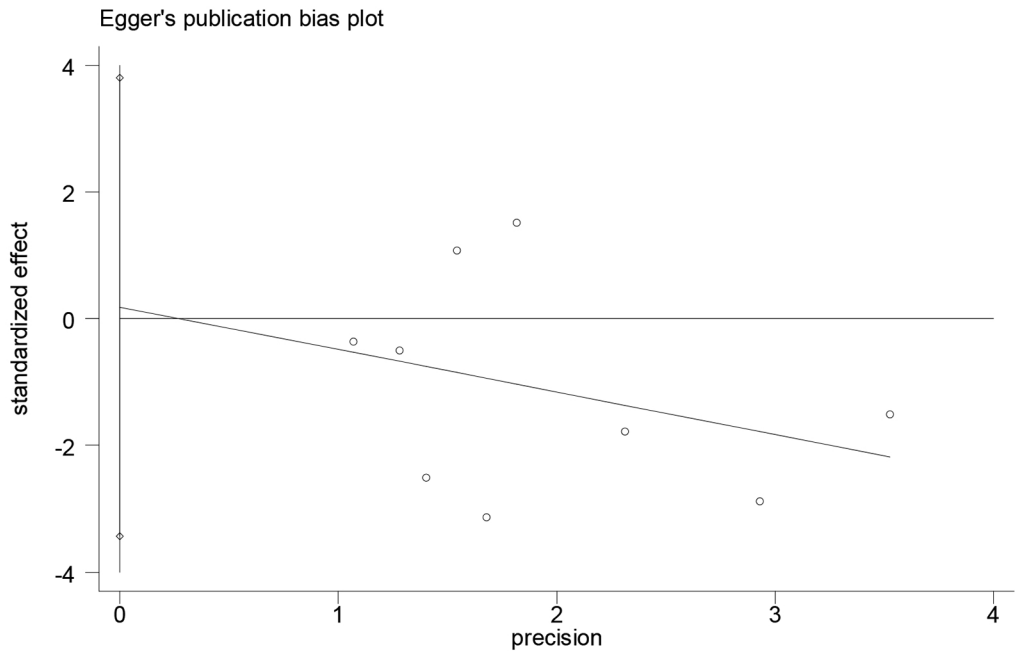

(c)

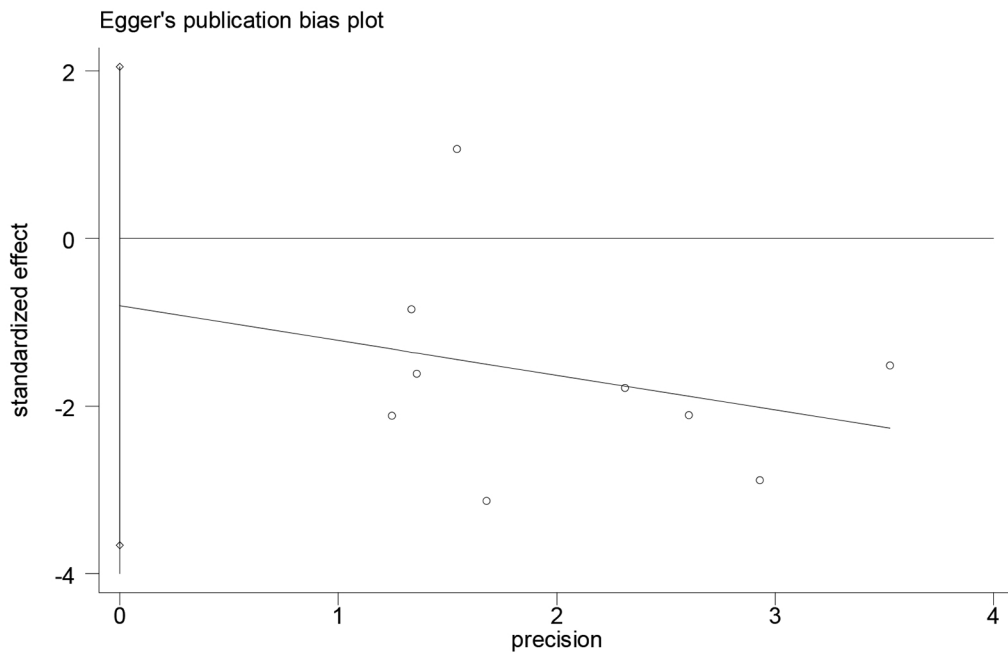

(d)

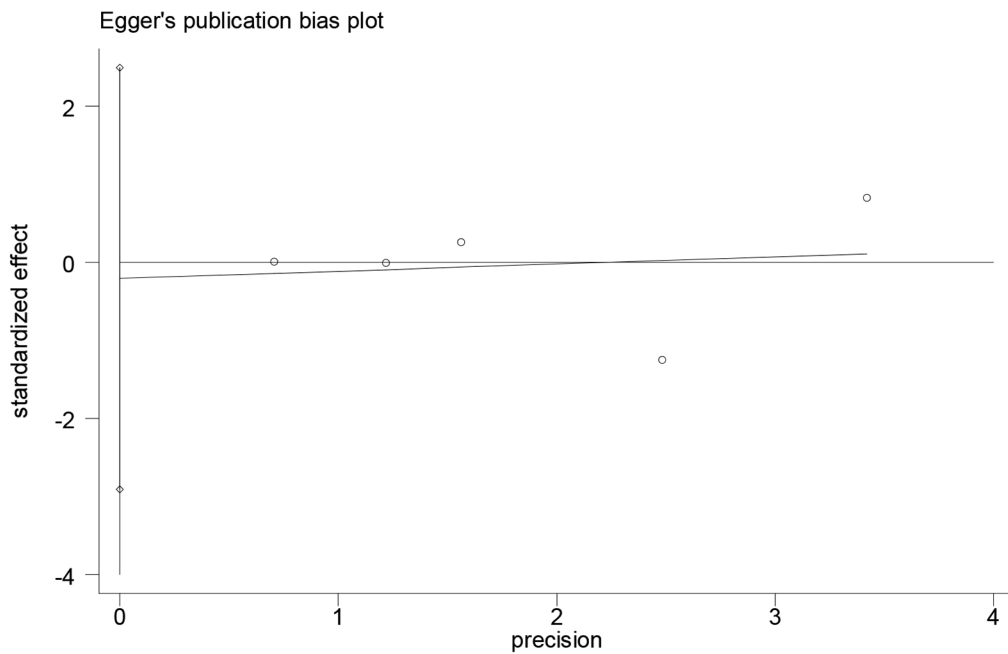

Supplement: MOESM4 [file 13298834]
